# Supplementary material for: Photoinduced enhancement of intraligand charge-transfer of a crystalline 3,3′-diindolyl(3-pyridyl)methane
Source: Royal Society of Chemistry journal article supplement (doi:10.1039/d3ce01283b), 2024-01-01
Supplement: d3ce01283b1.pdf [file d3ce01283b1.pdf]

## Supporting Information

### Photoinduced Enhancement of Intraligand Charge-Transfer of a Crystalline 3,3'-diindolyl(3-pyridyl)methane

Chaowat Kaenpracha,<sup>a</sup> Praewpan Katrun,<sup>b</sup> Kittipong Chainok,<sup>c</sup> Chattarika  
Sukpattanacharoen,<sup>d</sup> Nawee Kungwan,<sup>d</sup> and Jaurusup Boonmak<sup>a,\*</sup>

<sup>a</sup>*Materials Chemistry Research Center, Department of Chemistry and Center of Excellence for Innovation in Chemistry, Faculty of Science, Khon Kaen University, Khon Kaen 40002, Thailand. (e-mail: jaurusup@kku.ac.th)*

<sup>b</sup>*Department of Chemistry and Center of Excellence for Innovation in Chemistry, Faculty of Science, Khon Kaen University, Khon Kaen 40002, Thailand*

<sup>c</sup>*Thammasat University Research Unit in Multifunctional Crystalline Materials and Applications (TU-MCMA), Faculty of Science and Technology, Thammasat University, Pathum Thani 12121, Thailand*

<sup>d</sup>*Department of Chemistry, Faculty of Science, Chiang Mai University, Muang District, Chiang Mai 50200, Thailand*

\*E-mail: jaurusup@kku.ac.th

## Tables S1-S16

**Table S1** Crystal data and structural refinement for **PMDI·MeOH** and **PMDI·MeOH'** (CCDC nos. 2266873-2266874).

| crystal data                                                                | <b>PMDI·MeOH</b>                                 | <b>PMDI·MeOH'</b>                                |
|-----------------------------------------------------------------------------|--------------------------------------------------|--------------------------------------------------|
| <b>formula</b>                                                              | C <sub>23</sub> H <sub>21</sub> N <sub>3</sub> O | C <sub>23</sub> H <sub>21</sub> N <sub>3</sub> O |
| <b>formula weight</b>                                                       | 355.443                                          | 355.443                                          |
| <b>temperature (K)</b>                                                      | 296.15                                           | 296.15                                           |
| <b>crystal system</b>                                                       | Monoclinic                                       | Monoclinic                                       |
| <b>space group</b>                                                          | P2 <sub>1</sub> /n                               | P2 <sub>1</sub> /n                               |
| <b>a (Å)</b>                                                                | 14.5200(7)                                       | 14.5277(5)                                       |
| <b>b (Å)</b>                                                                | 9.3992(5)                                        | 9.4021(4)                                        |
| <b>c (Å)</b>                                                                | 15.1096(8)                                       | 15.0821(6)                                       |
| <b>α (°)</b>                                                                | 90                                               | 90                                               |
| <b>β (°)</b>                                                                | 112.583(2)                                       | 112.559(1)                                       |
| <b>γ (°)</b>                                                                | 90                                               | 90                                               |
| <b>V (Å<sup>3</sup>)</b>                                                    | 1903.99(17)                                      | 1902.45(13)                                      |
| <b>Z</b>                                                                    | 4                                                | 4                                                |
| <b>D<sub>calc</sub> (g cm<sup>-3</sup>)</b>                                 | 1.240                                            | 1.241                                            |
| <b>F(000)</b>                                                               | 752.442                                          | 752.442                                          |
| <b>μ (Mo Kα) (mm<sup>-1</sup>)</b>                                          | 0.077                                            | 0.078                                            |
| <b>data collected</b>                                                       | 3602                                             | 4533                                             |
| <b>unique data (R<sub>int</sub>)</b>                                        | 2805(0.0912)                                     | 3596(0.0968)                                     |
| <b>R<sub>1</sub><sup>a</sup>/ wR<sub>2</sub><sup>b</sup> [I &gt; 2σ(I)]</b> | 0.0694/0.1599                                    | 0.0746/0.1557                                    |
| <b>R<sub>1</sub><sup>a</sup>/ wR<sub>2</sub><sup>b</sup> (all data)</b>     | 0.0923/0.1730                                    | 0.0964/0.1672                                    |
| <b>GOF</b>                                                                  | 1.0789                                           | 1.0891                                           |
| <b>max/min e<sup>-</sup> density (e Å<sup>-3</sup>)</b>                     | 0.3424/-0.3314                                   | 0.2700/-0.3204                                   |

---

$$^a R_1 = \sum ||F_0| - |F_c|| / \sum |F_0|. \quad ^b wR_2 = \{ \sum [w(|F_0| - |F_c|)]^2 / \sum [w|F_0|^2] \}^{1/2}.$$

**Table S2** Selected bond distances (Å) of **PMDI·MeOH** and **PMDI·MeOH'**.

| Bond angles  | PMDI·MeOH | PMDI·MeOH' |
|--------------|-----------|------------|
| O(1) – C(1)  | 1.415(5)  | 1.409(5)   |
| N(1) – C(2)  | 1.342(4)  | 1.339(3)   |
| N(1) – C(6)  | 1.333(4)  | 1.331(3)   |
| N(2) – C(8)  | 1.376(3)  | 1.377(3)   |
| N(2) – C(15) | 1.373(4)  | 1.370(3)   |
| N(3) – C(16) | 1.373(4)  | 1.376(3)   |
| N(3) – C(23) | 1.378(4)  | 1.373(3)   |
| C(7) – C(9)  | 1.514(3)  | 1.511(3)   |
| C(7) – C(17) | 1.505(4)  | 1.505(3)   |

**Table S3** Selected bond angles (°) of **PMDI·MeOH** and **PMDI·MeOH'**.

| Bond angles          | PMDI·MeOH  | PMDI·MeOH' |
|----------------------|------------|------------|
| C(2) – N(1) – C(6)   | 116.9(3)   | 117.1(2)   |
| C(8) – N(2) – C(15)  | 108.8(2)   | 108.86(18) |
| C(16) – N(3) – C(23) | 108.7(2)   | 108.8(2)   |
| C(3) – N(7) – C(9)   | 111.2(2)   | 111.30(17) |
| C(3) – N(7) – C(17)  | 112.2(2)   | 112.31(17) |
| C(9) – N(7) – C(17)  | 114.71(19) | 114.68(17) |

**Table S4** Hydrogen bond lengths (Å) and angles (°) for **PMDI·MeOH** and **PMDI·MeOH'**.

| PMDI·MeOH/ PMDI·MeOH' |                   |                   |                     |                   |
|-----------------------|-------------------|-------------------|---------------------|-------------------|
| D-H···A               | d(D-H)/Å          | d(H···A)/Å        | d(D···A)/Å          | <(DHA)/°          |
| O(1)–H···N(1)         | 0.82(2)/0.82(2)   | 1.95(3)/(1.93(2)) | 2.715(3)/(2.716(3)) | 156(3)/161(2)     |
| N(2)–H···O(1)         | 0.860(3)/0.860(3) | 2.180(3)/2.180(3) | 3.000(3)/3.000(3)   | 159.3(3)/159.3(3) |
| N(3)–H···O(1)         | 0.860(3)/0.860(3) | 2.307(3)/2.310(3) | 2.993(3)/2.993(3)   | 136.8(3)/136.6(2) |

**Table S5**  $\pi$ -interactions distances ( $\text{\AA}$ ) for **PMDI·MeOH** and **PMDI·MeOH'**.

| <b>PMDI·MeOH/ PMDI·MeOH'</b>        |                                                          |                                                              |
|-------------------------------------|----------------------------------------------------------|--------------------------------------------------------------|
| <b><math>\pi</math>-interaction</b> | <b>d(H<math>\cdots</math>cg)/<math>\text{\AA}</math></b> | <b><math>\angle(\text{C-H}\cdots\text{cg})/^\circ</math></b> |
| C(4) – H $\cdots$ cg(5)             | 2.628(3)/2.630(2)                                        | 141.5(3)/141.2(3)                                            |
| C(5) – H $\cdots$ cg(1)             | 2.985(3)/2.987(3)                                        | 139.7(3)/139.9(3)                                            |
| C(6) – H $\cdots$ cg(4)             | 2.986(3)/2.986(3)                                        | 140.0(3)/140.5(3)                                            |
| C(8) – H $\cdots$ cg(2)             | 2.854(3)/2.853(2)                                        | 125.0(3)/125.1(2)                                            |
| C(14) – H $\cdots$ cg(4)            | 3.710(3)/3.708(2)                                        | 77.1(3)/77.3(2)                                              |

**Table S6** Crystal data and structural refinement for the same single crystal of **PMDI·MeOH** at various UV irradiation times and irradiated **PMDI·MeOH** that was left under ambient light for 2 weeks (CCDC nos. 2303197-2303201).

| crystal data                                                                                                   | As-prepared                                      | 25 min                                           | 40 min                                           | 80 min                                           | 2 weeks                                          |
|----------------------------------------------------------------------------------------------------------------|--------------------------------------------------|--------------------------------------------------|--------------------------------------------------|--------------------------------------------------|--------------------------------------------------|
| formula                                                                                                        | C <sub>23</sub> H <sub>21</sub> N <sub>3</sub> O |
| formula weight                                                                                                 | 355.443                                          | 355.443                                          | 355.443                                          | 355.443                                          | 355.443                                          |
| temperature (K)                                                                                                | 296(2)                                           | 296(2)                                           | 296(2)                                           | 296(2)                                           | 296(2)                                           |
| crystal system                                                                                                 | Monoclinic                                       | Monoclinic                                       | Monoclinic                                       | Monoclinic                                       | Monoclinic                                       |
| space group                                                                                                    | P2 <sub>1</sub> /n                               |
| <i>a</i> (Å)                                                                                                   | 14.5114(18)                                      | 14.4915(18)                                      | 14.4807(19)                                      | 14.4831(18)                                      | 14.4804(19)                                      |
| <i>b</i> (Å)                                                                                                   | 9.3994(11)                                       | 9.3952(9)                                        | 9.3916(10)                                       | 9.3913(9)                                        | 9.3873(10)                                       |
| <i>c</i> (Å)                                                                                                   | 15.0586(18)                                      | 15.0402(19)                                      | 15.0389(19)                                      | 15.0356(19)                                      | 15.0373(19)                                      |
| $\alpha$ (°)                                                                                                   | 90                                               | 90                                               | 90                                               | 90                                               | 90                                               |
| $\beta$ (°)                                                                                                    | 112.506(4)                                       | 112.575(4)                                       | 112.567(4)                                       | 112.580(4)                                       | 112.596(4)                                       |
| $\gamma$ (°)                                                                                                   | 90                                               | 90                                               | 90                                               | 90                                               | 90                                               |
| <i>V</i> (Å <sup>3</sup> )                                                                                     | 1897.5(4)                                        | 1890.8(4)                                        | 1888.6(4)                                        | 1888.3(4)                                        | 1887.1(4)                                        |
| <i>Z</i>                                                                                                       | 4                                                | 4                                                | 4                                                | 4                                                | 4                                                |
| <i>D</i> <sub>calc</sub> (g cm <sup>-3</sup> )                                                                 | 1.244                                            | 1.249                                            | 1.250                                            | 1.250                                            | 1.251                                            |
| <i>F</i> (000)                                                                                                 | 752.442                                          | 752.442                                          | 752.442                                          | 752.442                                          | 752                                              |
| $\mu$ (Mo K $\alpha$ ) (mm <sup>-1</sup> )                                                                     | 0.078                                            | 0.078                                            | 0.078                                            | 0.078                                            | 0.078                                            |
| data collected                                                                                                 | 3592                                             | 3727                                             | 3720                                             | 3720                                             | 3448                                             |
| unique data ( <i>R</i> <sub>int</sub> )                                                                        | 2222(0.0560)                                     | 2056(0.0650)                                     | 2036(0.0665)                                     | 2049 (0.0657)                                    | 2145(0.0452)                                     |
| <i>R</i> <sub>1</sub> <sup>a</sup> / <i>wR</i> <sub>2</sub> <sup>b</sup> [ <i>I</i> > 2 $\sigma$ ( <i>I</i> )] | 0.1083/0.2779                                    | 0.1197/0.3027                                    | 0.1119/0.2865                                    | 0.1189/0.3019                                    | 0.1228/0.3134                                    |
| <i>R</i> <sub>1</sub> <sup>a</sup> / <i>wR</i> <sub>2</sub> <sup>b</sup> (all data)                            | 0.1548/0.4118                                    | 0.1787/0.4518                                    | 0.1730/0.4333                                    | 0.1776/0.4517                                    | 0.1708/0.4094                                    |
| GOF                                                                                                            | 1.5726                                           | 1.6254                                           | 1.5304                                           | 1.6190                                           | 1.5692                                           |
| max/min e <sup>-</sup> density (e Å <sup>-3</sup> )                                                            | 0.5477/-0.4368                                   | 0.5526/-0.4247                                   | 0.4400/-0.4421                                   | 0.5611/-0.5150                                   | 0.5626/-0.4913                                   |

<sup>a</sup> $R_1 = \sum ||F_0| - |F_c|| / \sum |F_0|$ . <sup>b</sup> $wR_2 = \{ \sum [w(|F_0| - |F_c|)]^2 / \sum [w|F_0|^2] \}^{1/2}$ .

**Table S7** Selected bond distances (Å) for the same single crystal of **PMDI·MeOH** at various irradiation times and irradiated **PMDI·MeOH** that was left under ambient light for 2 weeks.

| Bond angles  | As-prepared | 25 min   | 40 min   | 80 min   | 2 weeks  |
|--------------|-------------|----------|----------|----------|----------|
| O(1) – C(1)  | 1.408(8)    | 1.408(9) | 1.409(9) | 1.408(9) | 1.394(9) |
| N(1) – C(2)  | 1.342(6)    | 1.332(8) | 1.335(8) | 1.341(8) | 1.343(8) |
| N(1) – C(6)  | 1.334(7)    | 1.333(8) | 1.335(7) | 1.330(7) | 1.337(7) |
| N(2) – C(8)  | 1.374(5)    | 1.376(7) | 1.378(6) | 1.373(7) | 1.377(6) |
| N(2) – C(11) | 1.366(6)    | 1.371(6) | 1.367(6) | 1.365(7) | 1.365(6) |
| N(3) – C(16) | 1.379(7)    | 1.379(8) | 1.376(8) | 1.380(8) | 1.380(8) |
| N(3) – C(19) | 1.363(6)    | 1.371(7) | 1.369(7) | 1.365(7) | 1.370(6) |
| C(7) – C(9)  | 1.505(6)    | 1.507(6) | 1.510(6) | 1.501(6) | 1.502(6) |
| C(7) – C(17) | 1.508(6)    | 1.490(8) | 1.489(6) | 1.493(7) | 1.492(6) |

**Table S8** Selected bond angles (°) for the same single crystal of **PMDI·MeOH** at various irradiation times and irradiated **PMDI·MeOH** that was left under ambient light for 2 weeks.

| Bond angles          | As-prepared | 25 min   | 40 min   | 80 min   | 2 weeks  |
|----------------------|-------------|----------|----------|----------|----------|
| C(2) – N(1) – C(6)   | 117.2(4)    | 117.8(5) | 117.0(5) | 117.4(5) | 117.1(4) |
| C(8) – N(2) – C(11)  | 108.8(4)    | 108.8(4) | 108.8(4) | 109.0(4) | 109.0(4) |
| C(16) – N(3) – C(19) | 109.1(4)    | 108.6(4) | 108.7(4) | 108.6(4) | 108.5(4) |
| C(3) – C(7) – C(9)   | 111.6(4)    | 110.8(4) | 110.8(4) | 111.3(4) | 111.1(4) |
| C(3) – C(7) – C(17)  | 112.5(4)    | 112.9(4) | 112.8(4) | 112.7(4) | 113.2(4) |
| C(9) – C(7) – C(17)  | 114.2(3)    | 114.6(4) | 114.6(4) | 114.4(4) | 114.3(4) |

**Table S9** Hydrogen bond lengths (Å) and angles (°) of **O(1)–H···N(1)** for the same single crystal of **PMDI·MeOH** at various irradiation times and irradiated **PMDI·MeOH** that was left under ambient light for 2 weeks.

| Irradiation time | d(H···A)/Å | d(D···A)/Å | <(DHA)/° |
|------------------|------------|------------|----------|
| As-prepared      | 1.71(6)    | 2.704(6)   | 168(4)   |
| 25 min           | 1.93(5)    | 2.712(6)   | 160(6)   |
| 40 min           | 1.90(5)    | 2.706(6)   | 167(5)   |
| 80 min           | 1.90(5)    | 2.701(6)   | 165(5)   |
| 2 weeks          | 1.92(5)    | 2.708(6)   | 162(5)   |

**Table S10** Hydrogen bond lengths (Å) and angles (°) of **N(2)-H···O(1)** for the same single crystal of **PMDI·MeOH** at various irradiation times and irradiated **PMDI·MeOH** that was left under ambient light for 2 weeks.

| Irradiation time | d(H···A)/Å | d(D···A)/Å | <(DHA)/° |
|------------------|------------|------------|----------|
| As-prepared      | 2.195(5)   | 3.013(5)   | 158.7(5) |
| 25 min           | 2.189(6)   | 3.007(5)   | 158.7(5) |
| 40 min           | 2.184(6)   | 3.003(5)   | 159.0(5) |
| 80 min           | 2.186(6)   | 3.006(5)   | 159.3(5) |
| 2 weeks          | 2.180(6)   | 3.002(5)   | 159.7(5) |

**Table S11** Hydrogen bond lengths (Å) and angles (°) of **N(3)-H···O(1)** for the same single crystal of **PMDI·MeOH** at various irradiation times and irradiated **PMDI·MeOH** that was left under ambient light for 2 weeks.

| Irradiation time | d(H···A)/Å | d(D···A)/Å | <(DHA)/° |
|------------------|------------|------------|----------|
| As-prepared      | 2.301(5)   | 2.990(5)   | 137.1(4) |
| 25 min           | 2.301(6)   | 2.985(6)   | 136.7(5) |
| 40 min           | 2.300(6)   | 2.987(6)   | 137.0(4) |
| 80 min           | 2.296(6)   | 2.981(6)   | 136.7(5) |
| 2 weeks          | 2.291(6)   | 2.981(6)   | 137.2(4) |

**Table S12** CH···cg distances of  $\pi$ -interactions (Å) for the same single crystal of **PMDI·MeOH** at various irradiation times and irradiated **PMDI·MeOH** that was left under ambient light for 2 weeks.

| <b>PMDI·MeOH/ PMDI·MeOH'</b> |             |          |          |          |          |
|------------------------------|-------------|----------|----------|----------|----------|
| $\pi$ -interaction           | As-prepared | 25 min   | 40 min   | 80 min   | 2 weeks  |
| C(4) – H···cg(5)             | 2.634(5)    | 2.636(5) | 2.628(5) | 2.622(5) | 2.619(5) |
| C(5) – H···cg(1)             | 2.983(6)    | 2.985(6) | 2.986(6) | 2.978(6) | 2.975(6) |
| C(6) – H···cg(4)             | 2.988(6)    | 2.971(7) | 2.975(6) | 2.976(7) | 2.964(6) |
| C(8) – H···cg(2)             | 2.855(5)    | 2.851(5) | 2.850(5) | 2.844(5) | 2.849(5) |
| C(12) – H···cg(4)            | 3.698(5)    | 3.680(5) | 3.688(5) | 3.668(5) | 3.675(5) |
| cg(4)···cg(4)                | 3.921(3)    | 3.917(4) | 3.920(4) | 3.916(4) | 3.924(3) |

**Table S13** Selected distances and dihedral angles (°) at S<sub>0</sub> and S<sub>1</sub> optimized geometries computed at B3LYP/6-311G(d) and TD-B3LYP/6-311G(d) levels.

| Molecule      | S <sub>0</sub> state |             |             |                    |              |              |
|---------------|----------------------|-------------|-------------|--------------------|--------------|--------------|
|               | Distance (Å)         |             |             | Dihedral angle (°) |              |              |
|               | N(2)···O(1)          | N(3)···O(1) | O(1)···N(1) | N(2)H···O(1)       | N(3)H···O(1) | O(1)H···N(1) |
| PMDI:MeOH-a   | 2.902                | -           | -           | 172.0              | -            | -            |
| PMDI:MeOH-b   | -                    | 2.902       | -           | -                  | 170.5        | -            |
| PMDI:MeOH-c   | -                    | -           | 2.862       | -                  | -            | 157.9        |
| PMDI:2MeOH-ab | 2.907                | 2.903       | -           | 171.0              | 169.1        | -            |
| PMDI:2MeOH-ac | 2.898                | -           | 2.860       | 170.2              | -            | 158.9        |
| PMDI:2MeOH-bc | -                    | 2.891       | 2.862       | -                  | 166.2        | 158.6        |
| PMDI:3MeOH    | 2.904                | 2.896       | 2.859       | 170.3              | 165.8        | 159.8        |
|               | S <sub>1</sub> state |             |             |                    |              |              |
|               | Distance (Å)         |             |             | Dihedral angle (°) |              |              |
|               | N(2)···O(1)          | N(3)···O(1) | O(1)···N(1) | N(2)H···O(1)       | N(3)H···O(1) | O(1)H···N(1) |
| PMDI:MeOH-a   | 2.828                | -           | -           | 175.6              | -            | -            |
| PMDI:MeOH-b   | -                    | 2.805       | -           | -                  | 170.1        | -            |
| PMDI:MeOH-c   | -                    | -           | 2.718       | -                  | -            | 161.3        |
| PMDI:2MeOH-ab | 2.889                | 2.811       | -           | 155.0              | 171.1        | -            |
| PMDI:2MeOH-ac | 2.825                | -           | 2.713       | 176.6              | -            | 162.1        |
| PMDI:2MeOH-bc | -                    | 2.716       | 2.653       | -                  | 145.5        | 162.2        |
| PMDI:3MeOH    | 2.859                | 2.773       | 2.665       | 173.1              | 141.5        | 162.7        |



**Table S14** Theoretical absorption data for S<sub>0</sub> state, oscillator strength (f), and molecular orbitals (MOs) contribution calculated by TD-B3LYP/6-311G(d) level.

| Molecule      | $\lambda_{\text{abs}}$ (nm) | f     | MOs contribution | Character          |
|---------------|-----------------------------|-------|------------------|--------------------|
| PMDI          | 260                         | 0.062 | H-1→L+3 (72%)    | <sup>1</sup> LLCT  |
|               | 368                         | 0.004 | H→L (97%)        | <sup>1</sup> LLCT  |
| PMDI·MeOH-a   | 266                         | 0.063 | H-1→L+1 (55%)    | $\pi$ - $\pi^*$ IL |
|               | 301                         | 0.011 | H→L (96%)        | <sup>1</sup> LLCT  |
| PMDI·MeOH-b   | 268                         | 0.058 | H→L+3 (82%)      | $\pi$ - $\pi^*$ IL |
|               | 310                         | 0.004 | H→L (98%)        | <sup>1</sup> LLCT  |
| PMDI·MeOH-c   | 261                         | 0.063 | H-1→L+2 (81%)    | $\pi$ - $\pi^*$ IL |
|               | 319                         | 0.004 | H→L (99%)        | <sup>1</sup> LLCT  |
| PMDI·2MeOH-ab | 266                         | 0.064 | H-1→L+2 (76%)    | $\pi$ - $\pi^*$ IL |
|               | 311                         | 0.003 | H→L (98%)        | <sup>1</sup> LLCT  |
| PMDI·2MeOH-ac | 264                         | 0.050 | H-1→L+2 (88%)    | $\pi$ - $\pi^*$ IL |
|               | 324                         | 0.007 | H→L (94%)        | <sup>1</sup> LLCT  |
| PMDI·2MeOH-bc | 262                         | 0.063 | H-1→L+2 (81%)    | $\pi$ - $\pi^*$ IL |
|               | 339                         | 0.007 | H→L (99%)        | <sup>1</sup> LLCT  |
| PMDI·3MeOH    | 265                         | 0.064 | H-1→L+2 (87%)    | $\pi$ - $\pi^*$ IL |
|               | 339                         | 0.005 | H→L (99%)        | <sup>1</sup> LLCT  |

**Table S15** Theoretical absorption data for S<sub>1</sub> state, oscillator strength (f), and molecular orbitals (MOs) contribution calculated by TD-B3LYP/6-311G(d) level.

| Molecule      | $\lambda_{\text{emiss}}$ (nm) | f     | MOs contribution | Character          |
|---------------|-------------------------------|-------|------------------|--------------------|
| PMDI          | 282                           | 0.065 | H→L+2 (64%)      | $\pi$ - $\pi^*$ IL |
|               | 368                           | 0.002 | H→L (100%)       | <sup>1</sup> LLCT  |
| PMDI·MeOH-a   | 301                           | 0.056 | H→L+3 (90%)      | $\pi$ - $\pi^*$ IL |
|               | 413                           | 0.012 | H→L (100%)       | <sup>1</sup> LLCT  |
| PMDI·MeOH-b   | 286                           | 0.083 | H→L+3 (86%)      | $\pi$ - $\pi^*$ IL |
|               | 388                           | 0.002 | H→L (100%)       | <sup>1</sup> LLCT  |
| PMDI·MeOH-c   | 263                           | 0.037 | H-1→L+1 (59%)    | $\pi$ - $\pi^*$ IL |
|               | 447                           | 0.005 | H→L (100%)       | <sup>1</sup> LLCT  |
| PMDI·2MeOH-ab | 287                           | 0.079 | H→L+3 (90%)      | $\pi$ - $\pi^*$ IL |
|               | 397                           | 0.001 | H→L (100%)       | <sup>1</sup> LLCT  |
| PMDI·2MeOH-ac | 302                           | 0.062 | H→L+3 (93%)      | $\pi$ - $\pi^*$ IL |
|               | 474                           | 0.004 | H→L (100%)       | <sup>1</sup> LLCT  |
| PMDI·2MeOH-bc | 294                           | 0.053 | H→L+3 (92%)      | $\pi$ - $\pi^*$ IL |
|               | 515                           | 0.003 | H→L (100%)       | <sup>1</sup> LLCT  |
| PMDI·3MeOH    | 303                           | 0.035 | H→L+3 (78%)      | $\pi$ - $\pi^*$ IL |
|               | 553                           | 0.008 | H→L (100%)       | <sup>1</sup> LLCT  |

**Table S16** HOMO and LUMO energy levels (eV) at S<sub>0</sub> and S<sub>1</sub> optimized geometries calculated by TD-B3LYP/6-311G(d) level.

| Molecule      | S <sub>0</sub> state |       |                | S <sub>1</sub> state |       |                |
|---------------|----------------------|-------|----------------|----------------------|-------|----------------|
|               | HOMO                 | LUMO  | E <sub>g</sub> | HOMO                 | LUMO  | E <sub>g</sub> |
| PMDI          | -5.55                | -0.74 | 4.82           | -5.21                | -1.21 | 4.00           |
| PMDI·MeOH-a   | -5.32                | -0.60 | 4.72           | -4.69                | -1.08 | 3.62           |
| PMDI·MeOH-b   | -5.20                | -0.59 | 4.61           | -4.85                | -1.03 | 3.82           |
| PMDI·MeOH-c   | -5.59                | -1.09 | 4.50           | -5.04                | -1.65 | 3.39           |
| PMDI·2MeOH-ab | -5.06                | -0.45 | 4.61           | -4.75                | -1.00 | 3.75           |
| PMDI·2MeOH-ac | -5.39                | -0.96 | 4.43           | -4.77                | -1.54 | 3.23           |
| PMDI·2MeOH-bc | -5.24                | -0.96 | 4.28           | -4.86                | -1.82 | 3.03           |
| PMDI·3MeOH    | -5.11                | -0.83 | 4.27           | -4.56                | -1.71 | 2.86           |

**Figures S1-S19**

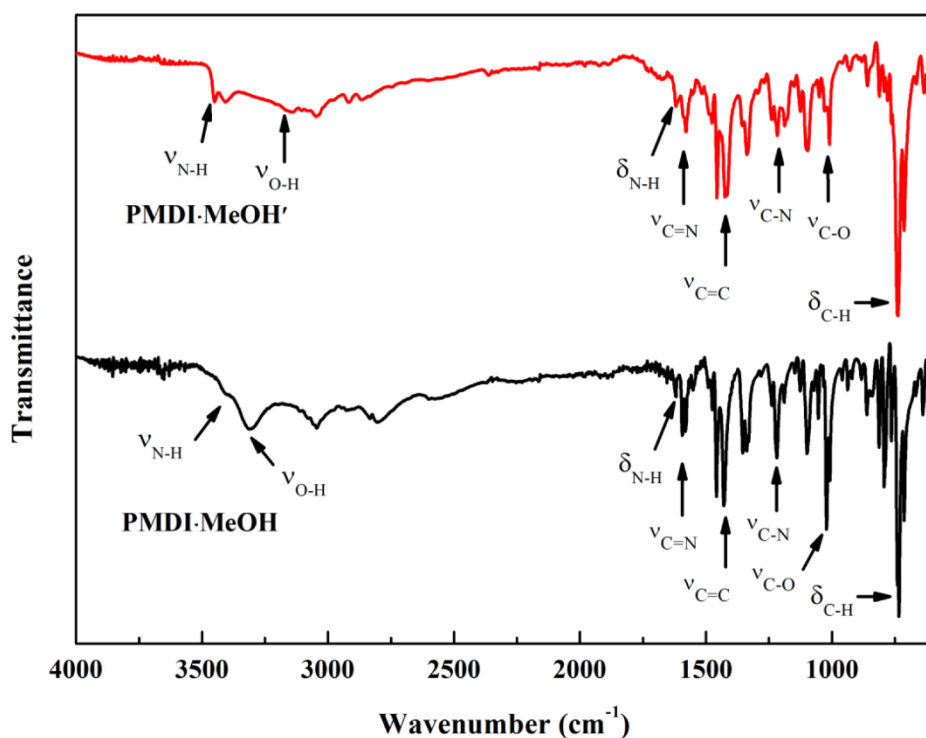

**Figure S1** The comparison of FTIR spectra of **PMDI·MeOH** and **PMDI·MeOH'**.

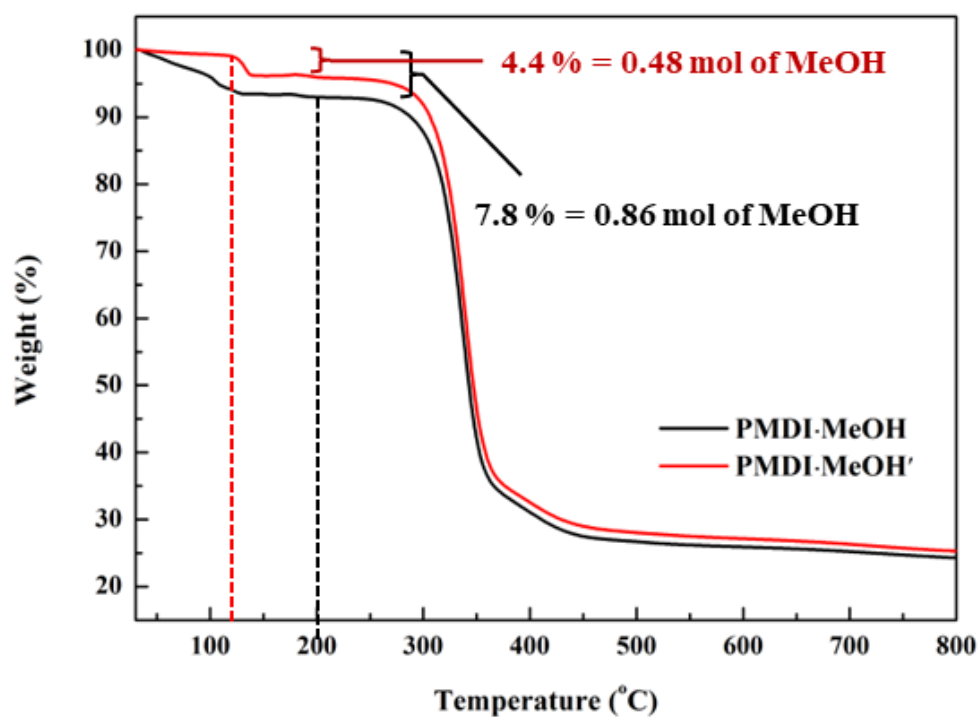

**Figure S2** The comparison of thermograms of **PMDI·MeOH** and **PMDI·MeOH'**.

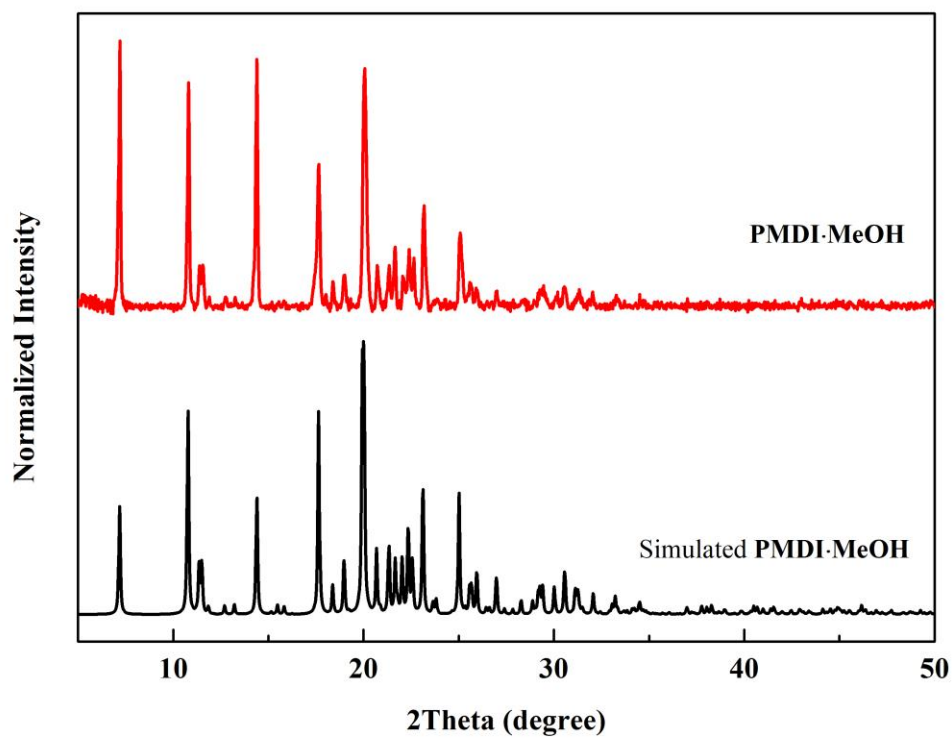

**Figure S3** The PXRD pattern of PMDI·MeOH.

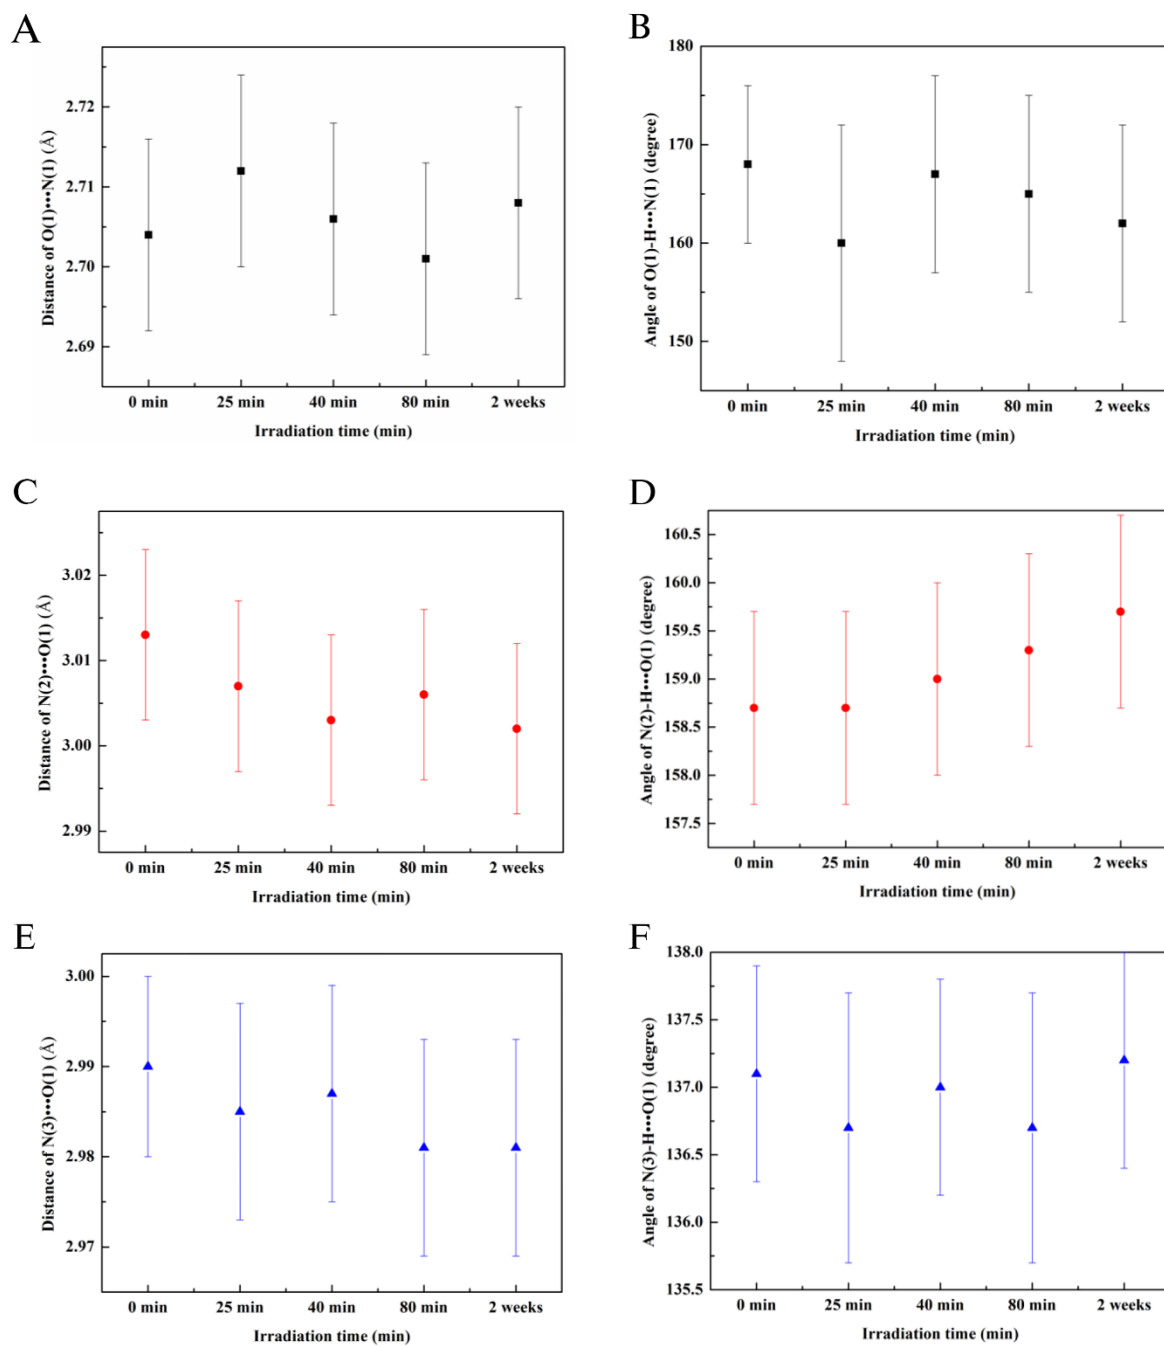

**Figure S4** The variations of hydrogen bonds for **PMDI·MeOH** at various irradiation times and irradiated **PMDI·MeOH** that was left under ambient light for 2 weeks.

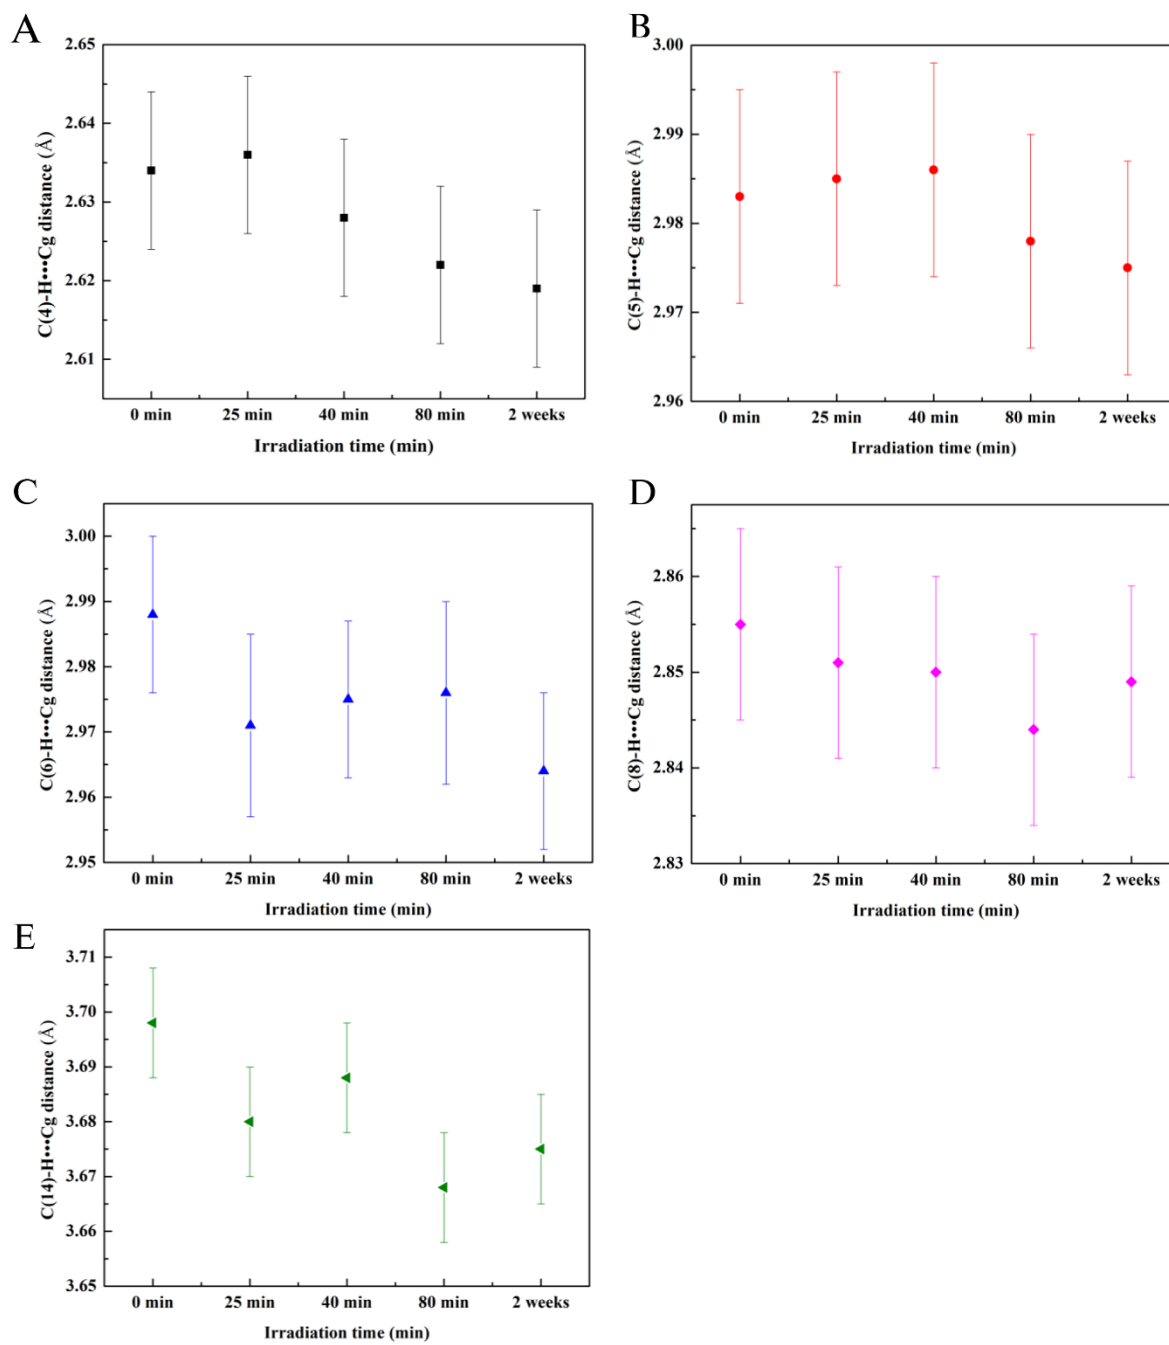

**Figure S5** The variations of CH- $\pi$  interactions for **PMDI·MeOH** at various irradiation times and irradiated **PMDI·MeOH** that was left under ambient light for 2 weeks.

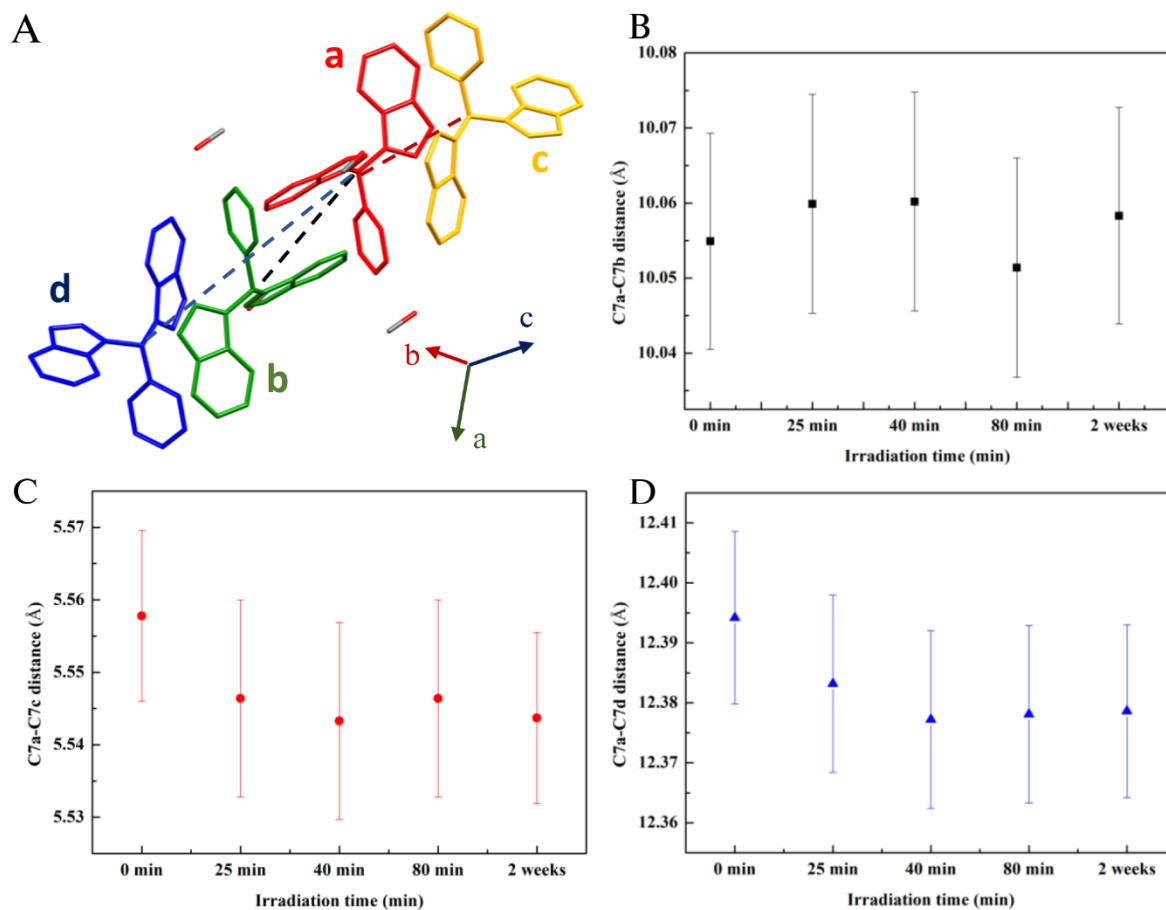

**Figure S6** The shortened distances between three adjacent PMDI molecules measured between C(7) atoms of **PMDI** at various irradiation times and irradiated **PMDI·MeOH** that was left under ambient light for 2 weeks.



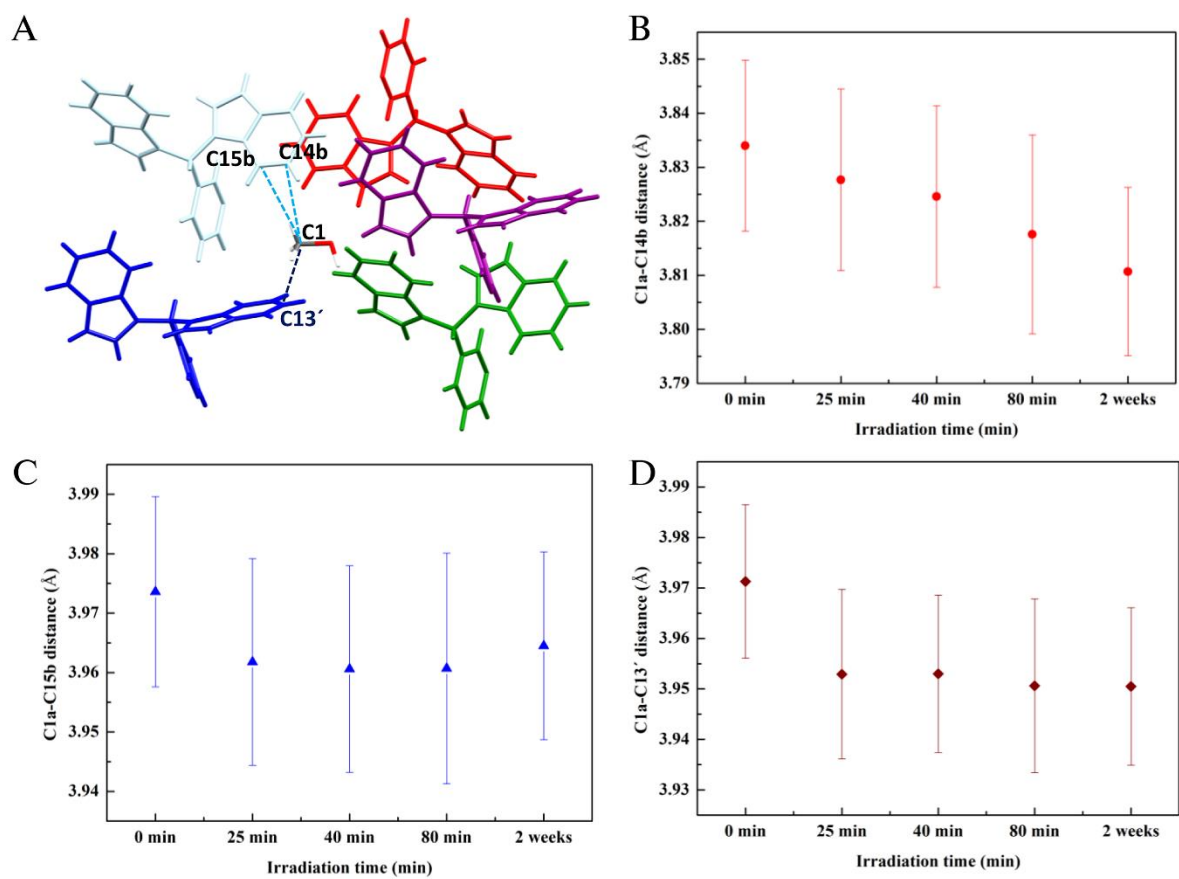

**Figure S7** The variations of short contacts around C(1) atom of methanol in **PMDI·MeOH** at various irradiation times and irradiated **PMDI·MeOH** that was left under ambient light for 2 weeks.

A

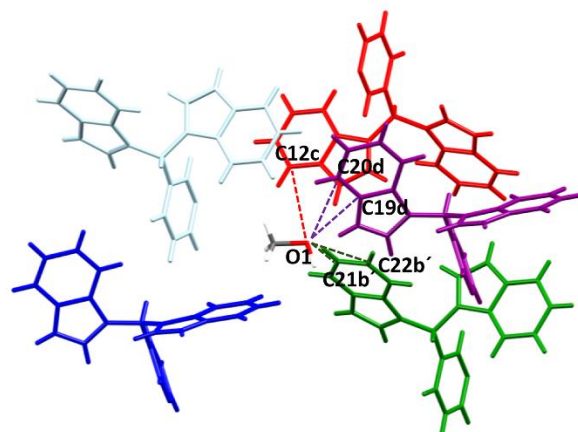

B

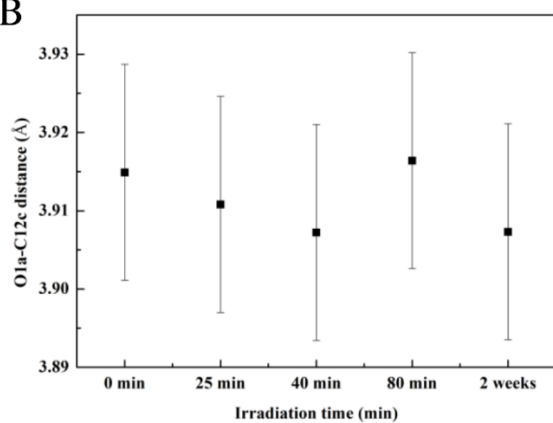

C

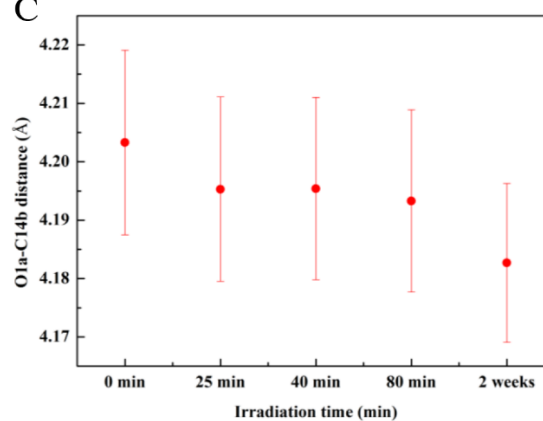

D

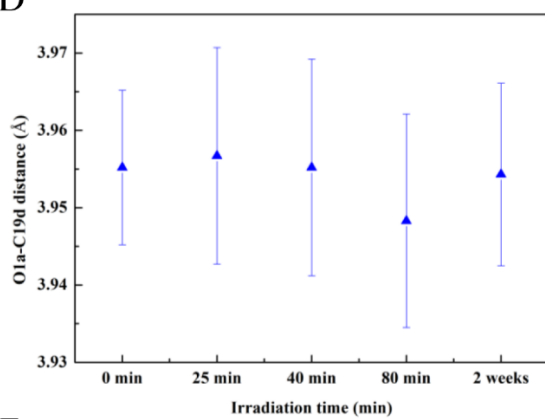

E

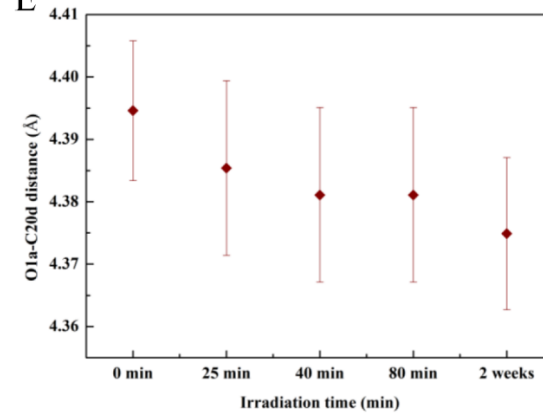

F

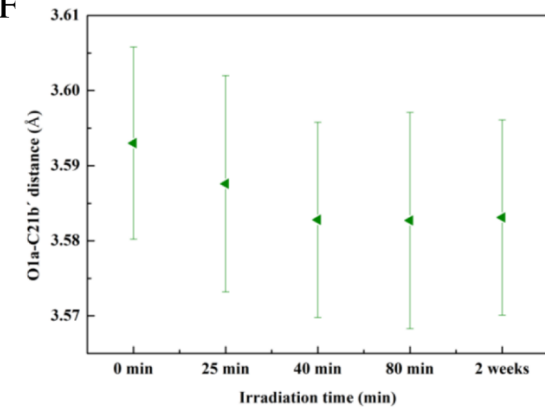

G

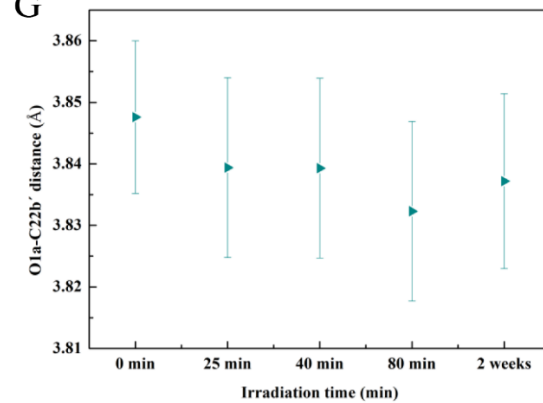

**Figure S8** The variations of short contacts around O(1) atom of methanol in **PMDI·MeOH** at various irradiation times and irradiated **PMDI·MeOH** that was left under ambient light for 2 weeks.

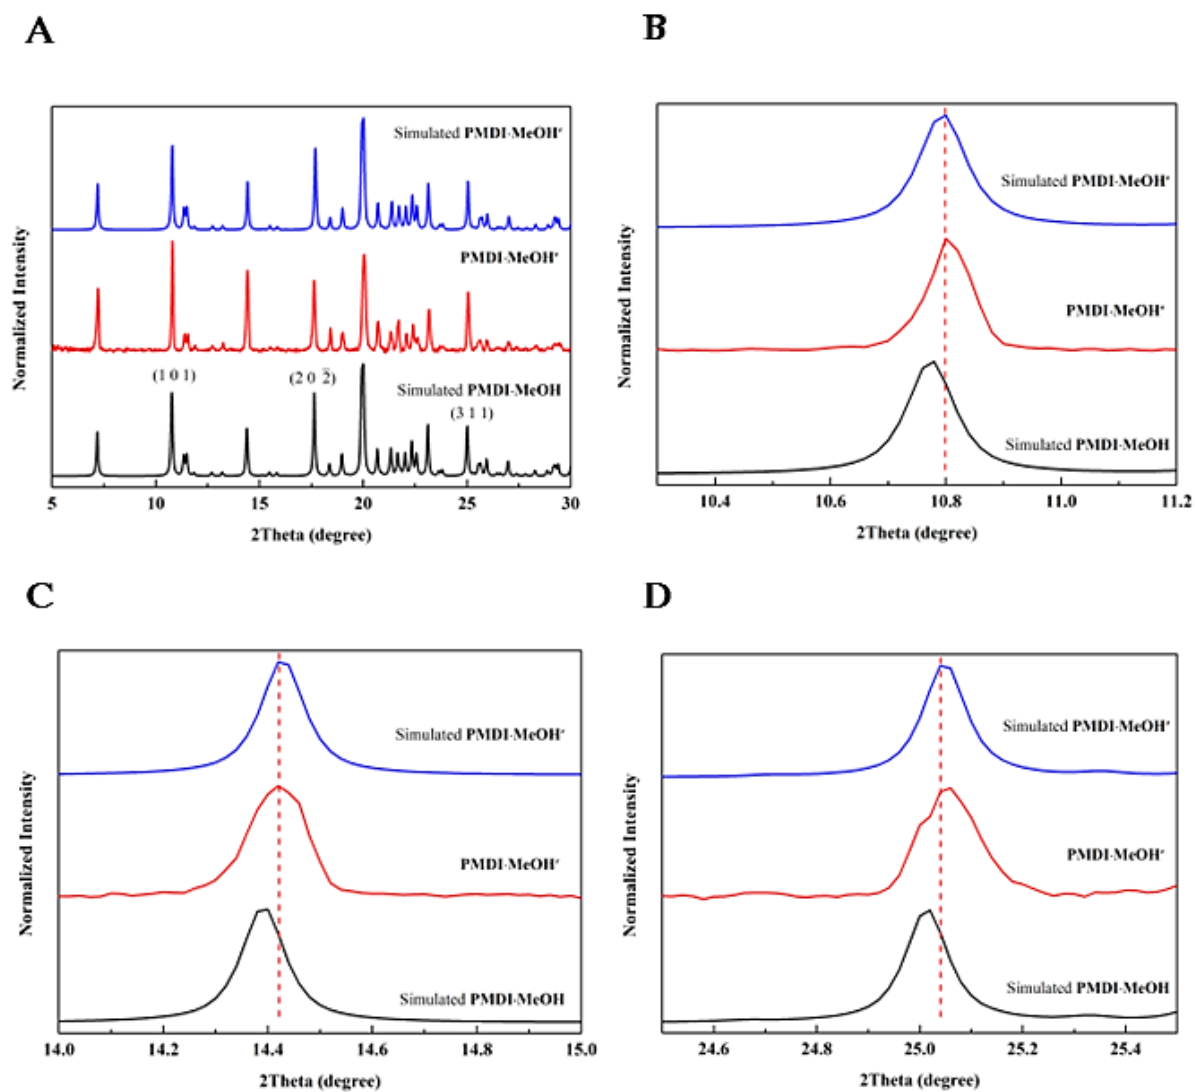

**Figure S9** (A) The PXRD patterns of **PMDI·MeOH'** and close-up diffraction peaks of (B) (101), (C) (20-2), and (D) (311) .

A

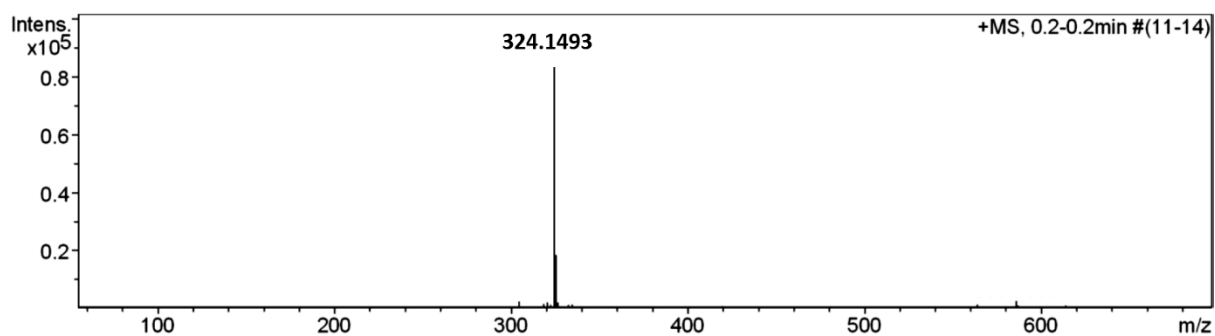

B

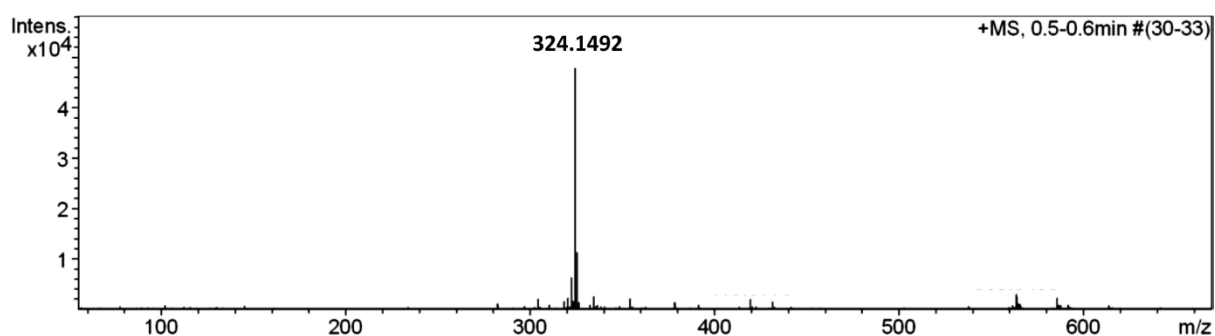

Figure S10 The ESI-MS spectra of (A)  $\text{PMDI} \cdot \text{MeOH}$  and (B)  $\text{PMDI} \cdot \text{MeOH}'$ .

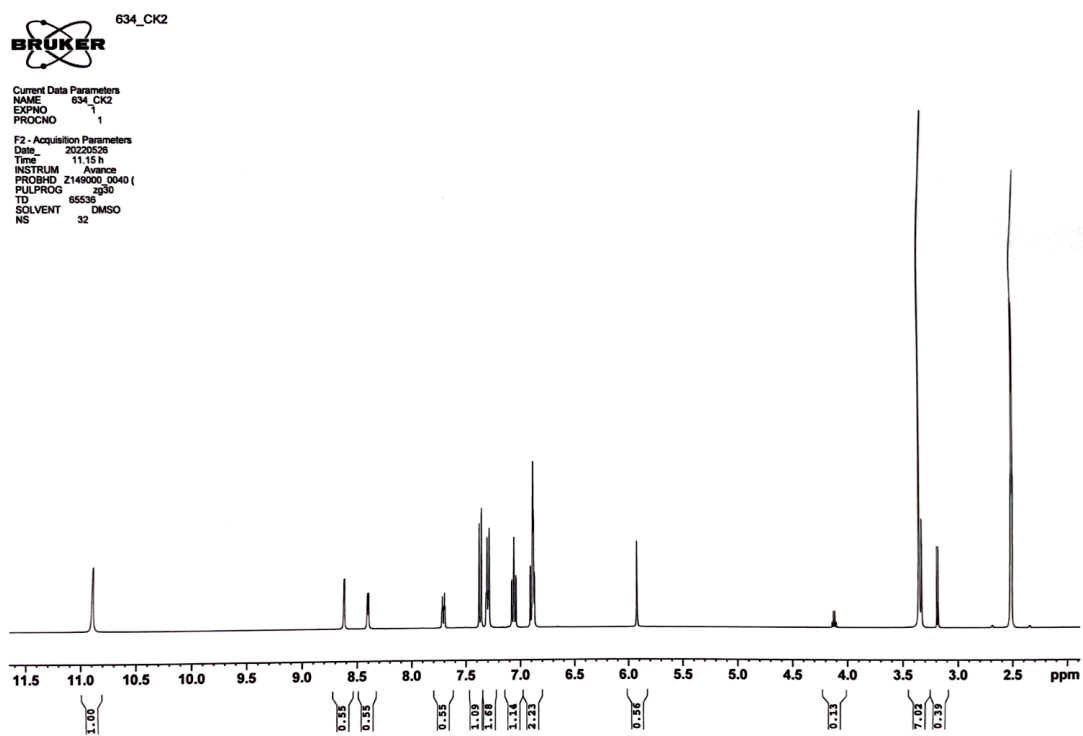

Figure S11  $^1\text{H-NMR}$  spectrum of synthesized  $\text{PMDI}$ .

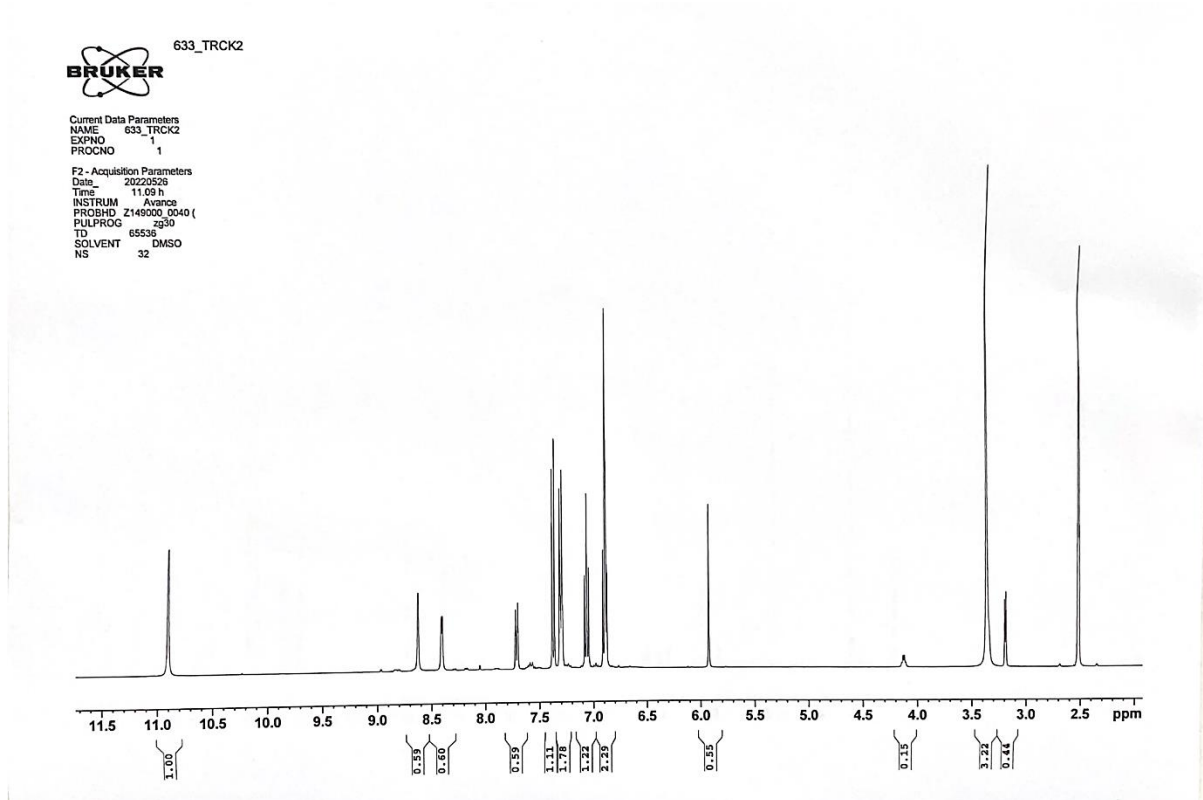

Figure S12  $^1\text{H-NMR}$  spectrum of synthesized PMDI'.

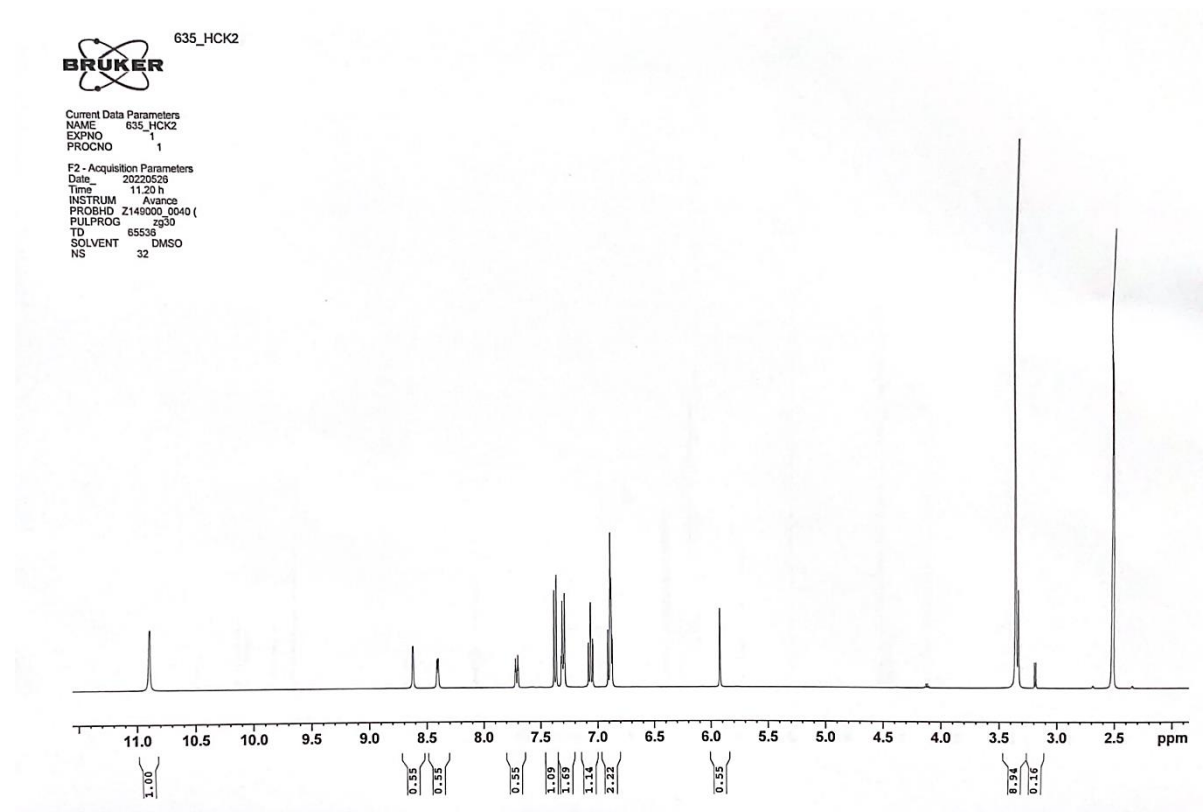

Figure S13  $^1\text{H-NMR}$  spectrum of synthesized PMDI''.

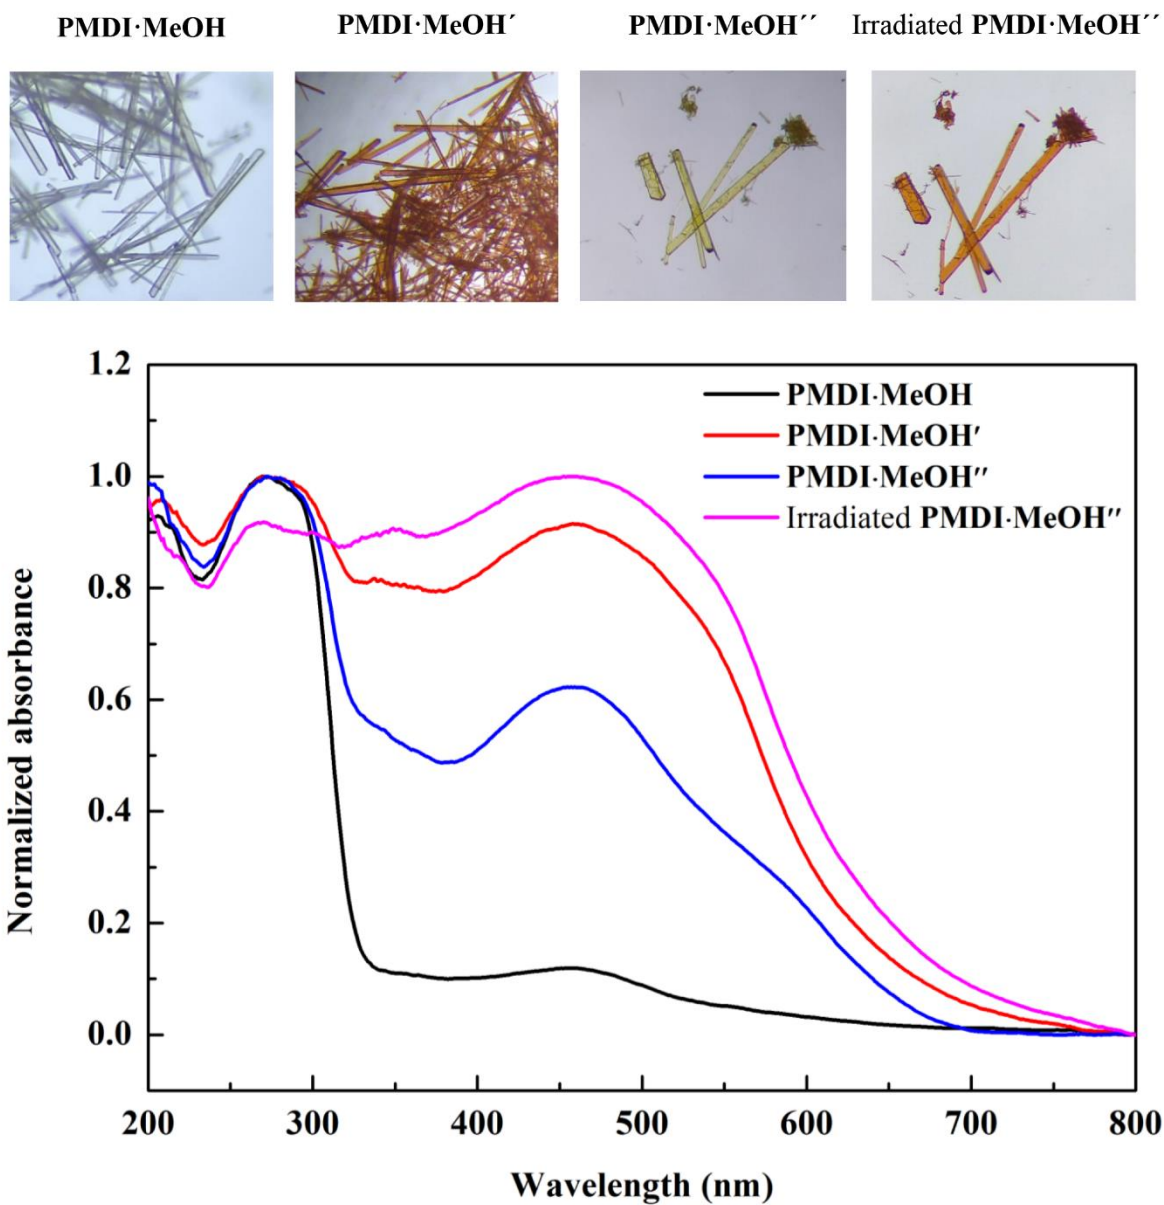

**Figure S14** The color change of **PMDI·MeOH** upon UV irradiation and heating and the diffuse reflectance spectra of as-prepared, irradiated, heated **PMDI·MeOH** and irradiation treatment after heating of **PMDI·MeOH**.

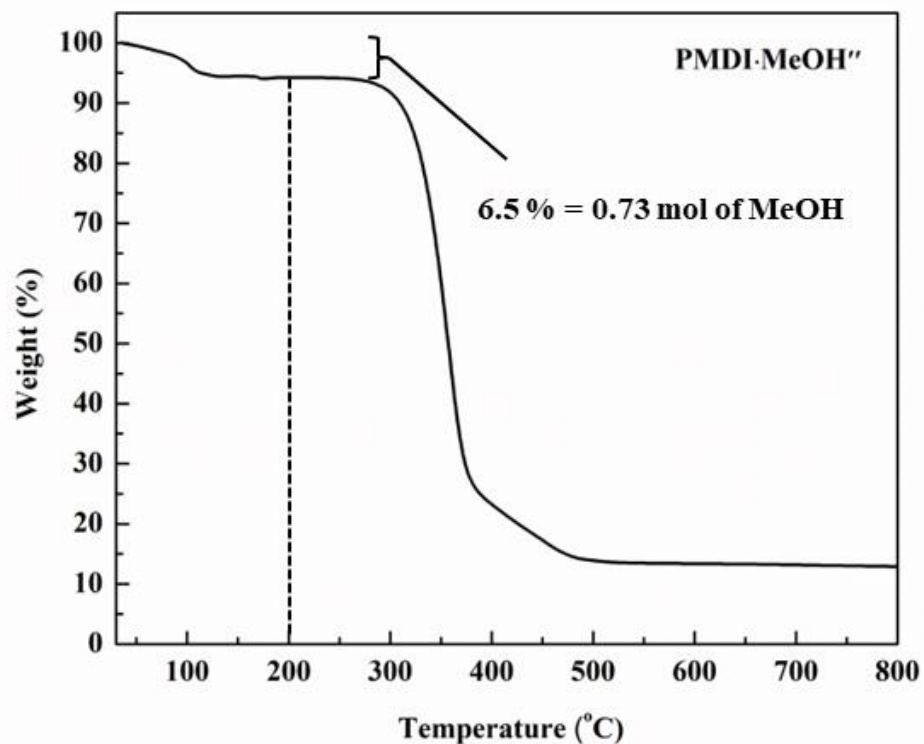

Figure S15 The thermogram of **PMDI·MeOH''**.

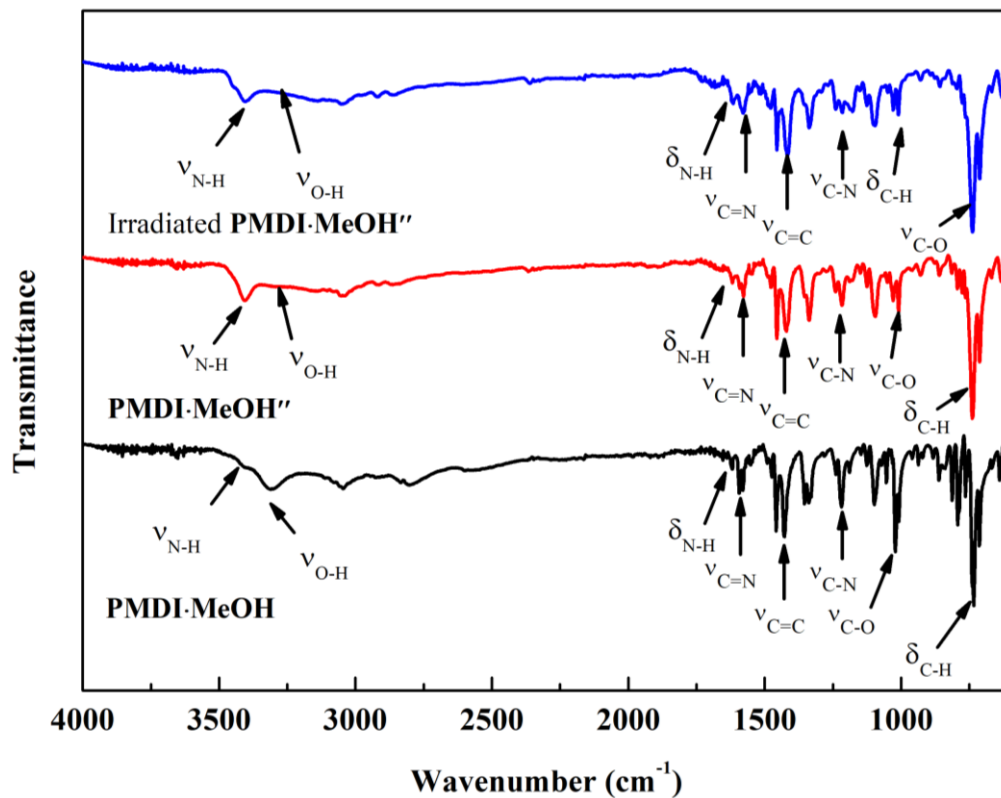

Figure S16 The comparison of FTIR spectra of **PMDI·MeOH**, **PMDI·MeOH''** and irradiated **PMDI·MeOH''**.

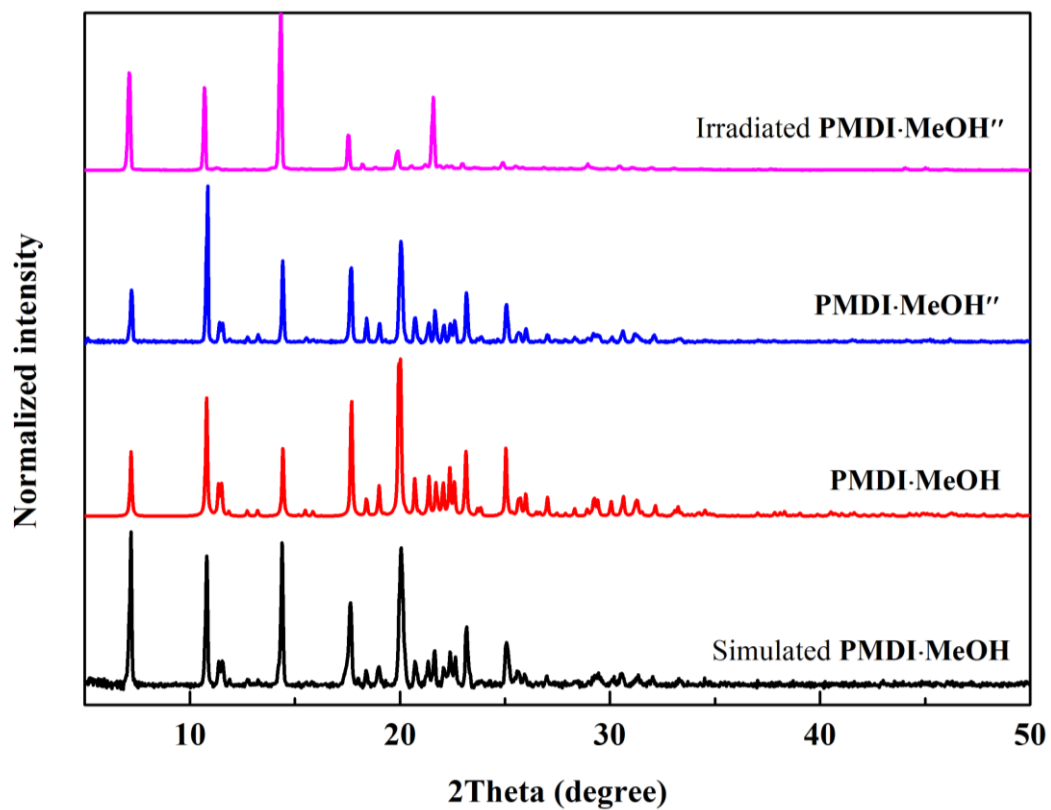

**Figure S17** The comparison of PXRD patterns of **PMDI·MeOH**, **PMDI·MeOH''** and irradiated **PMDI·MeOH''**.



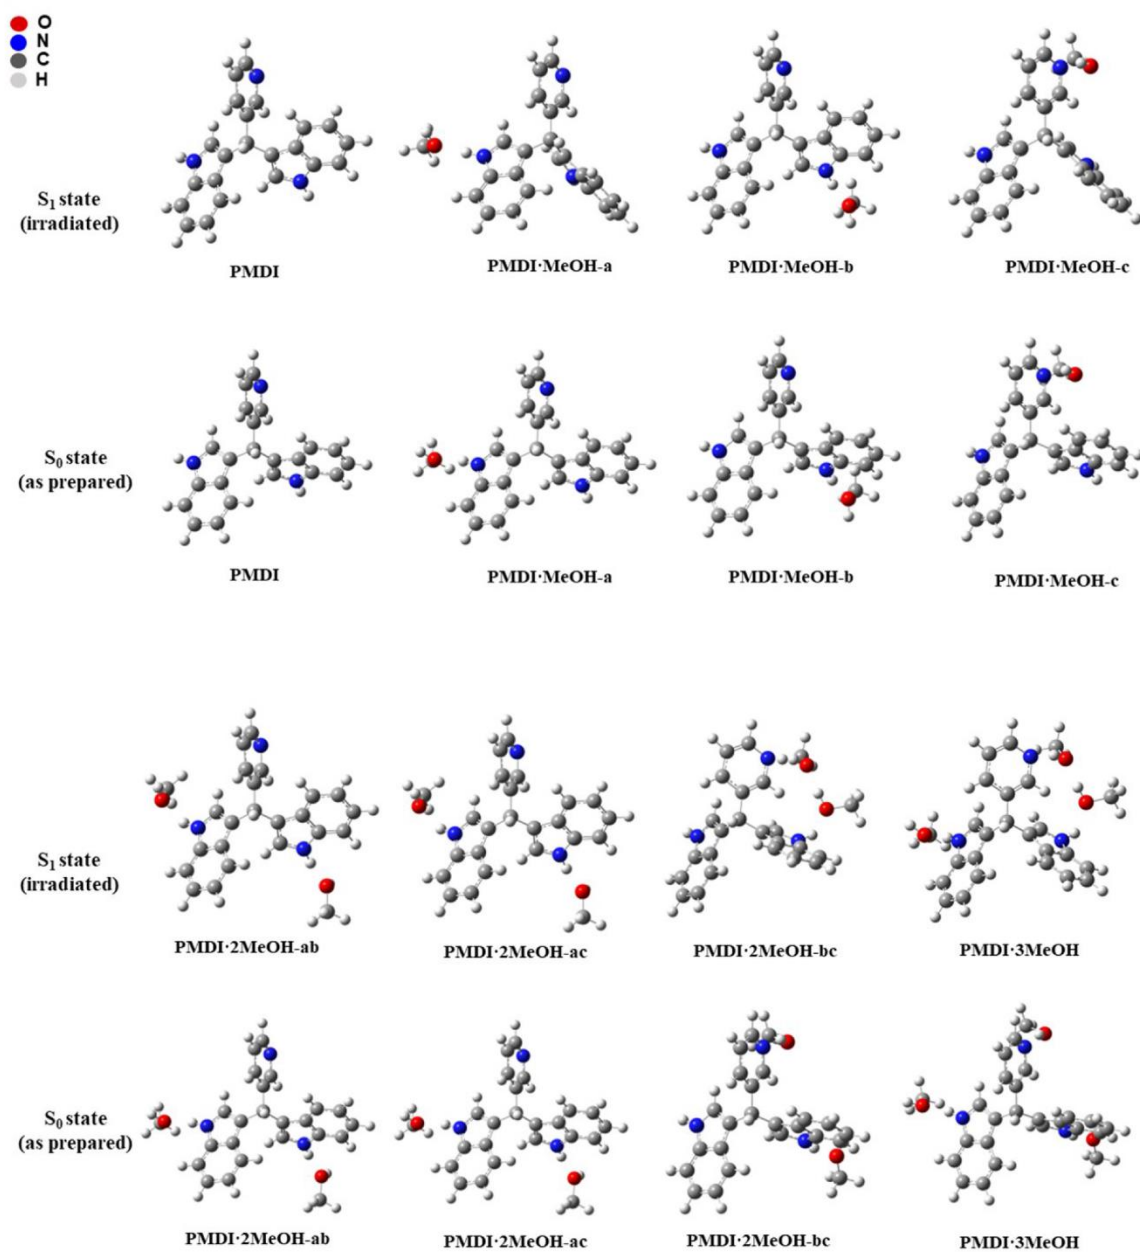

**Figure S18** S<sub>0</sub> and S<sub>1</sub> optimized geometries computed at B3LYP/6-311G(d) level.

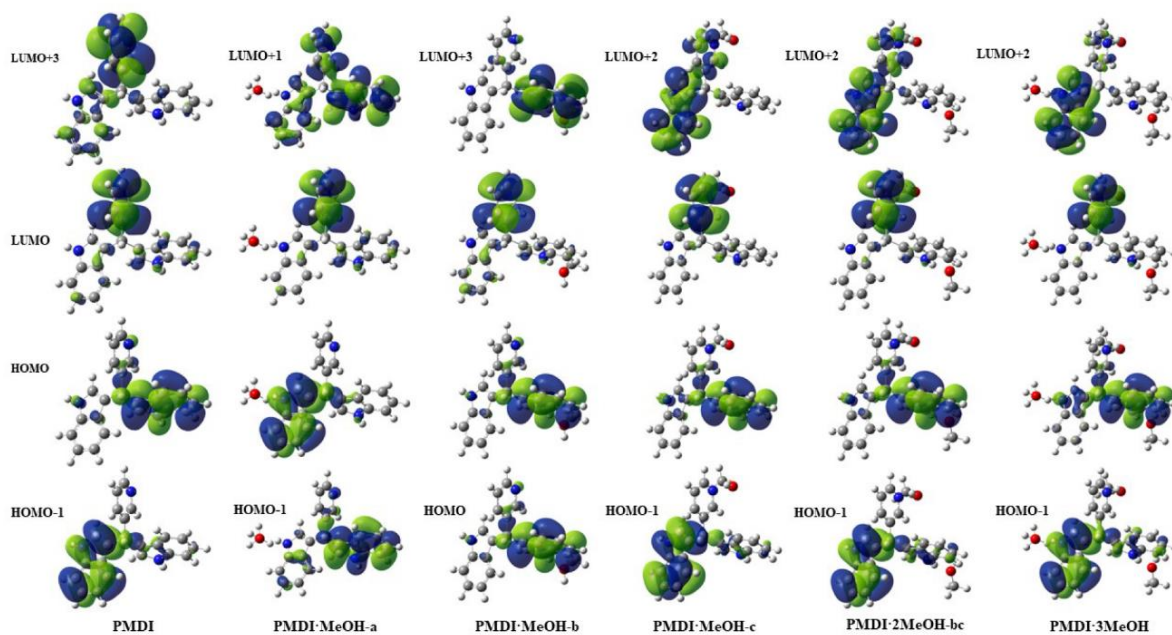

**Figure S19** HOMO and LUMO orbitals and frontier MOs corresponding to the main transition of absorption spectra at  $S_0$  optimized geometries computed at TD-B3LYP/6-311G(d) level.

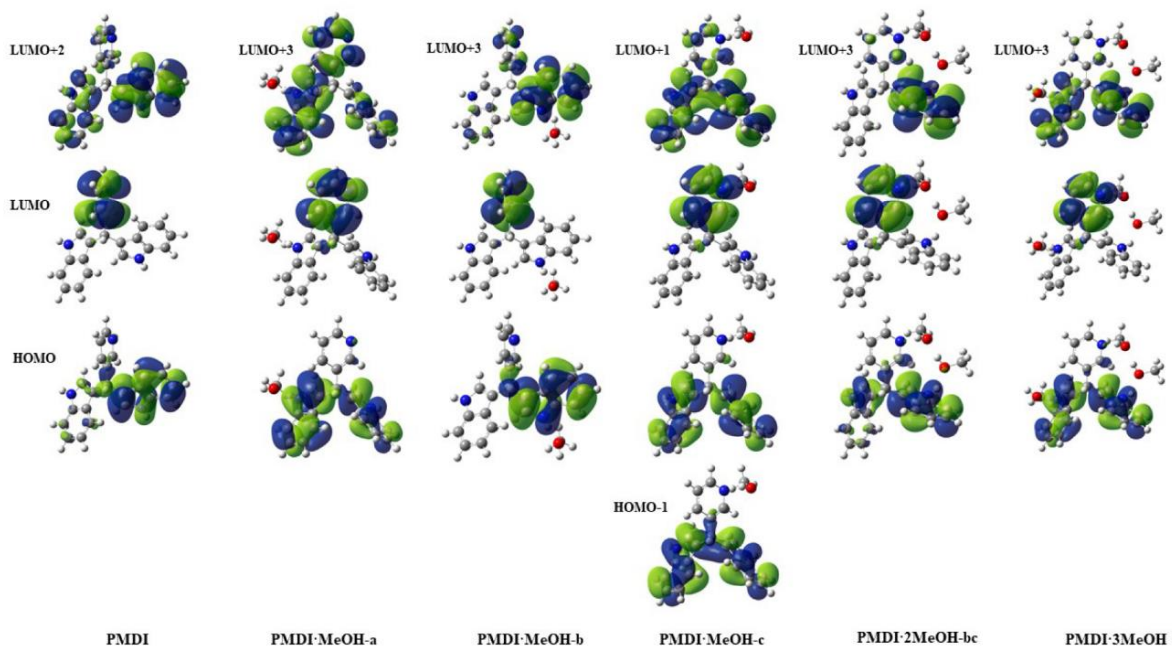

**Figure S20** HOMO and LUMO orbitals and frontier MOs corresponding to the main transition of absorption spectra at  $S_1$  optimized geometries computed at TD-B3LYP/6-311G(d) level.
